# Supplementary material
Source: Springer Nature journal article supplement (https://www.springermedizin.de/resource/supplementary/12947_2012_424_MOESM3_ESM.pdf/9555732)

Low cIBS values

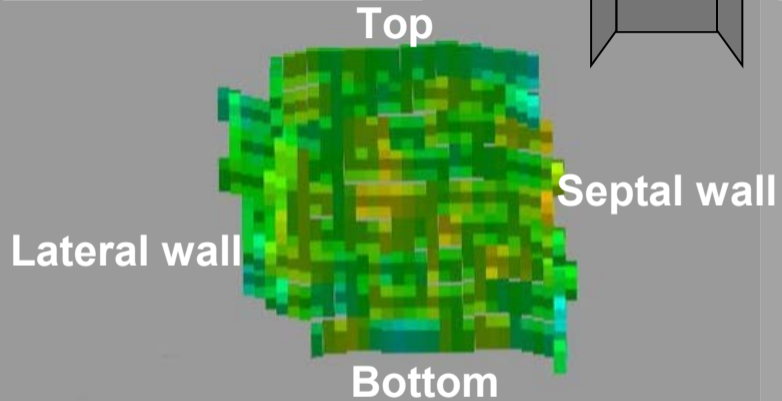

High cIBS values

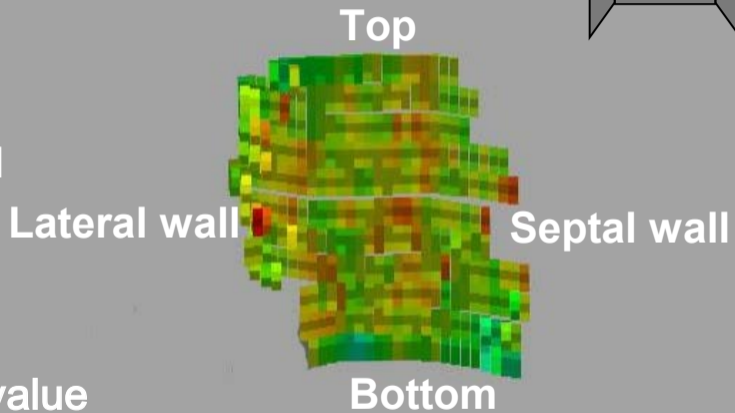

cIBS value

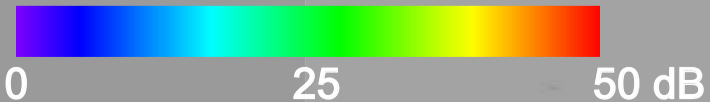

Supplement: MOESM3 [file 9555732]
